# Supplementary material
Source: PubMed Central journal article supplement (PMC3587218)
Supplement: 1220589110_pnas.201220589SI.pdf [file 1220589110_pnas.201220589SI.pdf]

# Supporting Information

Châtelain et al. 10.1073/pnas.1220589110

## MSRs A

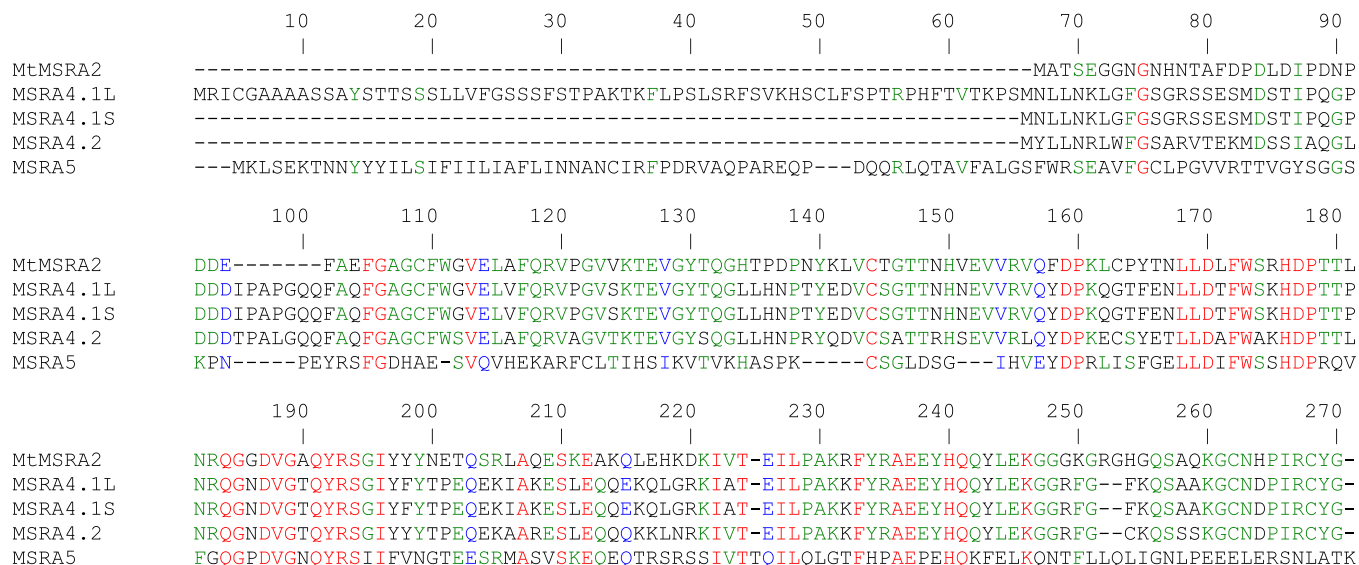

## MSRs B

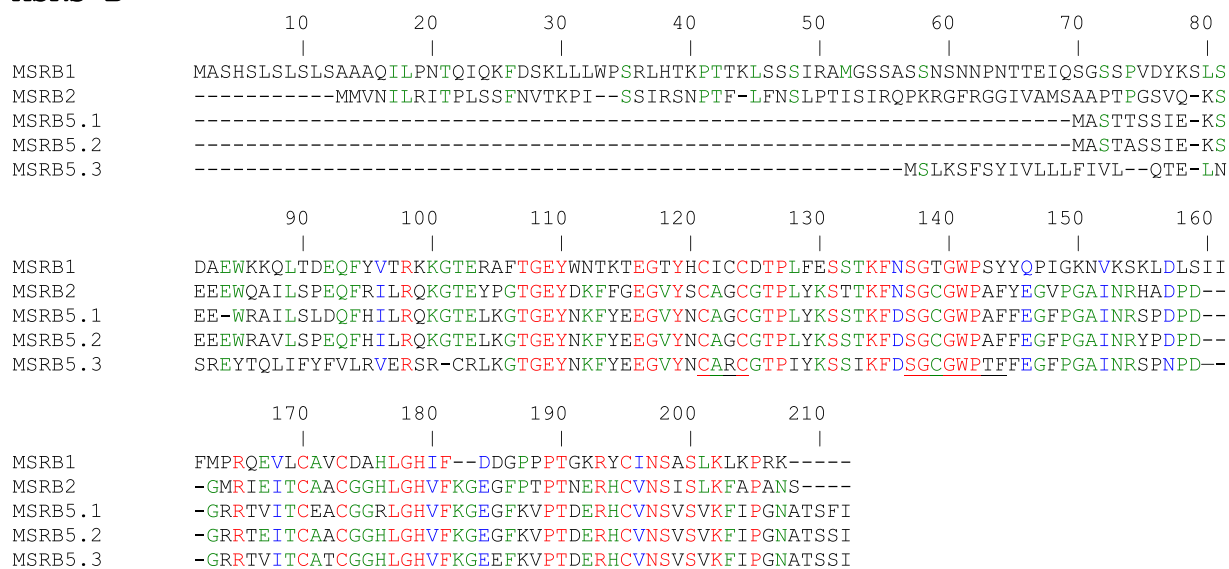

**Fig. S1.** Alignment of isoforms of MSRs of A type and B type of *Medicago truncatula*. The protein sequences deduced from the coding regions of tentative consensus (TC) (Table S1) found in the TIGR database were aligned. Identical and conserved amino acid residues are shown in red and blue, respectively. Residues that are identical in several, but not all, sequences are in green.

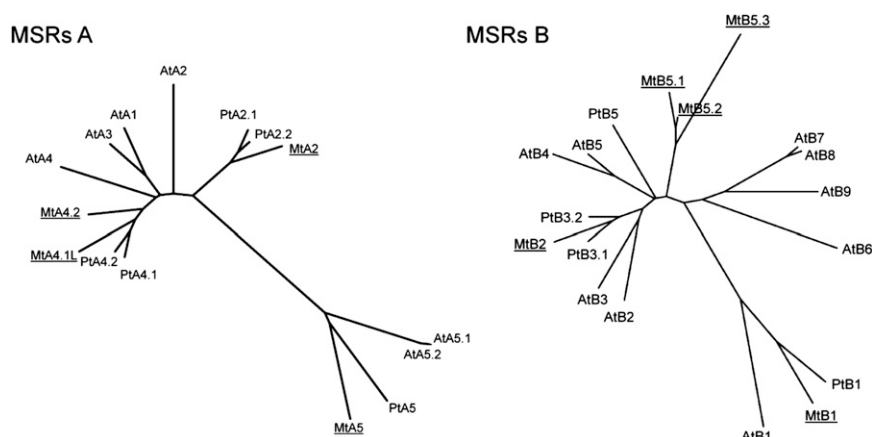

|               |                                                                                                        |      |      |      |      |      |      |      |      |      |
|---------------|--------------------------------------------------------------------------------------------------------|------|------|------|------|------|------|------|------|------|
|               | 10                                                                                                     | 20   | 30   | 40   | 50   | 60   | 70   | 80   | 90   | 100  |
| A41S_mRNA     | GGCACGAGGAAAACGTCATCTTTTGGCGTGAACGAATCCCATTTCTATAACAACCATTTGAAGCCTTTCCCATTTCTCTCTCTTTTGGTTCTTTCACCTC   |      |      |      |      |      |      |      |      |      |
| A41L_mRNA     | -----GTAACAACCATTTGAAGCCTTTCC-ATTCTCTCTCTCTTTTGGTTCTTTCACCTC                                           |      |      |      |      |      |      |      |      |      |
| A41S_Mtr37743 | GGCACGAGGAAAACGTCATCTTTTGGCGTGAACGAATCCCATTTCTATAACAACCATTTGAAGCCTTTCCCATTTCTCTCTCTTTTGGTTCTTTCACCTC   |      |      |      |      |      |      |      |      |      |
| A41L_Mtr37742 | -----CGCGGCCGAGGTACGCGGGGATTCTTATAACAACCATTTGAAGCCTTTCCCATTTCTCTCTCTTTTGGTTCTTTCACCTC                  |      |      |      |      |      |      |      |      |      |
|               | 110                                                                                                    | 120  | 130  | 140  | 150  | 160  | 170  | 180  | 190  | 200  |
| A41S_mRNA     | ACACTCTCCCTTGGATGAGAATTTGTGGAGCAGGGTGTTTTGAAGATGATATAATTTCTAGATAAGGGTTCTCATCTTACTCAAACCTCTTAGCAGCAGC   |      |      |      |      |      |      |      |      |      |
| A41L_mRNA     | ACACTCTCCCTTGGG-----TTGTTGAAGATGAGAATTTGTGA-----GCAGCAGC                                               |      |      |      |      |      |      |      |      |      |
| A41S_Mtr37743 | ACACTCTCCCTTGGATGAGAATTTGTGGAGCAGGGTGTTTTGAAGATGATATAATTTCTAGATAAGGGTTCTCATCTTACTCAAACCTCTTAGCAGCAGC   |      |      |      |      |      |      |      |      |      |
| A41L_Mtr37742 | ACACTCTCCCTTGGG-----TTGTTGAAGATGAGAATTTGTGA-----GCAGCAGC                                               |      |      |      |      |      |      |      |      |      |
|               | 210                                                                                                    | 220  | 230  | 240  | 250  | 260  | 270  | 280  | 290  | 300  |
| A41S_mRNA     | CAGCAGCGCTATAGCACCACGTCAGCTCCCTGCTAGTGTGGTTGTTCTTCTCTCTCTCCACTCTGCCAAAACAAAGTTCTACCTCCTCACTTTCTAGA     |      |      |      |      |      |      |      |      |      |
| A41L_mRNA     | CAGCAGCGCTATAGCACCACGTCAGCTCCCTGCTAGTGTGGTTGTTCTTCTCTCTCTCCACTCTGCCAAAACAAAGTTCTACCTCCTCACTTTCTAGA     |      |      |      |      |      |      |      |      |      |
| A41S_Mtr37743 | CAGCAGCGCTATAGCACCACGTCAGCTCCCTGCTAGTGTGGTTGTTCTTCTCTCTCTCCACTCTGCCAAAACAAAGTTCTACCTCCTCACTTTCTAGA     |      |      |      |      |      |      |      |      |      |
| A41L_Mtr37742 | CAGCAGCGCTATAGCACCACGTCAGCTCCCTGCTAGTGTGGTTGTTCTTCTCTCTCTCCACTCTGCCAAAACAAAGTTCTACCTCCTCACTTTCTAGA     |      |      |      |      |      |      |      |      |      |
|               | 310                                                                                                    | 320  | 330  | 340  | 350  | 360  | 370  | 380  | 390  | 400  |
| A41S_mRNA     | TTTTCTGTCAAGCATTCTTGCTTGTTTTACCACCCGTCCTCATTTTACTGTAACCAAGCCCTCCATGAACCTTCTGAACAACTTGGATTGGCAGTG       |      |      |      |      |      |      |      |      |      |
| A41L_mRNA     | TTTTCTGTCAAGCATTCTTGCTTGTTTTACCACCCGTCCTCATTTTACTGTAACCAAGCCCTCCATGAACCTTCTGAACAACTTGGATTGGCAGTG       |      |      |      |      |      |      |      |      |      |
| A41S_Mtr37743 | TTTTCTGTCAAGCATTCTTGCTTGTTTTACCACCCGTCCTCATTTTACTGTAACCAAGCCCTCCATGAACCTTCTGAACAACTTGGATTGGCAGTG       |      |      |      |      |      |      |      |      |      |
| A41L_Mtr37742 | TTTTCTGTCAAGCATTCTTGCTTGTTTTACCACCCGTCCTCATTTTACTGTAACCAAGCCCTCCATGAACCTTCTGAACAACTTGGATTGGCAGTG       |      |      |      |      |      |      |      |      |      |
|               | 410                                                                                                    | 420  | 430  | 440  | 450  | 460  | 470  | 480  | 490  | 500  |
| A41S_mRNA     | GAAGGTCATCAGAGAGCATGGATTCAACCATTCCTCAGGGACCAGATGACGATATACCAGCACCAGGCCAGCAGTTTGTCTCAATTTGGGGCTGGCTGCTT  |      |      |      |      |      |      |      |      |      |
| A41L_mRNA     | GAAGGTCATCAGAGAGCATGGATTCAACCATTCCTCAGGGACCAGATGACGATATACCAGCACCAGGCCAGCAGTTTGTCTCAATTTGGGGCTGGCTGCTT  |      |      |      |      |      |      |      |      |      |
| A41S_Mtr37743 | GAAGGTCATCAGAGAGCATGGATTCAACCATTCCTCAGGGACCAGATGACGATATACCAGCACCAGGCCAGCAGTTTGTCTCAATTTGGGGCTGGCTGCTT  |      |      |      |      |      |      |      |      |      |
| A41L_Mtr37742 | GAAGGTCATCAGAGAGCATGGATTCAACCATTCCTCAGGGACCAGATGACGATATACCAGCACCAGGCCAGCAGTTTGTCTCAATTTGGGGCTGGCTGCTT  |      |      |      |      |      |      |      |      |      |
|               | 510                                                                                                    | 520  | 530  | 540  | 550  | 560  | 570  | 580  | 590  | 600  |
| A41S_mRNA     | TTGGGGTGTGAATTGGTCTTCCAGAGGGTTCTTGAGTGAGTAAGACAGAGGTTGGTTACACCCAGGGGCTTTTGACAATCTTACTTATGAGGATGTG      |      |      |      |      |      |      |      |      |      |
| A41L_mRNA     | TTGGGGTGTGAATTGGTCTTCCAGAGGGTTCTTGAGTGAGTAAGACAGAGGTTGGTTACACCCAGGGGCTTTTGACAATCTTACTTATGAGGATGTG      |      |      |      |      |      |      |      |      |      |
| A41S_Mtr37743 | TTGGGGTGTGAATTGGTCTTCCAGAGGGTTCTTGAGTGAGTAAGACAGAGGTTGGTTACACCCAGGGGCTTTTGACAATCTTACTTATGAGGATGTG      |      |      |      |      |      |      |      |      |      |
| A41L_Mtr37742 | TTGGGGTGTGAATTGGTCTTCCAGAGGGTTCTTGAGTGAGTAAGACAGAGGTTGGTTACACCCAGGGGCTTTTGACAATCTTACTTATGAGGATGTG      |      |      |      |      |      |      |      |      |      |
|               | 610                                                                                                    | 620  | 630  | 640  | 650  | 660  | 670  | 680  | 690  | 700  |
| A41S_mRNA     | TGTTTCAGGGACCACAACCATTAACGAGGTTGAAGGGTCCAATATGATCCCAACAGGCACCTTCGAAAATCTGCTTGATACATTCTGGTCGAACACG      |      |      |      |      |      |      |      |      |      |
| A41L_mRNA     | TGTTTCAGGGACCACAACCATTAACGAGGTTGAAGGGTCCAATATGATCCCAACAGGCACCTTCGAAAATCTGCTTGATACATTCTGGTCGAACACG      |      |      |      |      |      |      |      |      |      |
| A41S_Mtr37743 | TGTTTCAGGGACCACAACCATTAACGAGGTTGAAGGGTCCAATATGATCCCAACAGGCACCTTCGAAAATCTGCTTGATACATTCTGGTCGAACACG      |      |      |      |      |      |      |      |      |      |
| A41L_Mtr37742 | TGTTTCAGGGACCACAACCATTAACGAGGTTGAAGGGTCCAATATGATCCCAACAGGCACCTTCGAAAATCTGCTTGATACATTCTGGTCGAACACG      |      |      |      |      |      |      |      |      |      |
|               | 710                                                                                                    | 720  | 730  | 740  | 750  | 760  | 770  | 780  | 790  | 800  |
| A41S_mRNA     | ATCCTACTACGCCAAATCGACAGGGGAATGATGTGGGAACACAGTACAGATCTGGAATATACTTTTACACTCCTGAACAAGAGAAAAAGCTAAGAGTC     |      |      |      |      |      |      |      |      |      |
| A41L_mRNA     | ATCCTACTACGCCAAATCGACAGGGGAATGATGTGGGAACACAGTACAGATCTGGAATATACTTTTACACTCCTGAACAAGAGAAAAAGCTAAGAGTC     |      |      |      |      |      |      |      |      |      |
| A41S_Mtr37743 | ATCCTACTACGCCAAATCGACAGGGGAATGATGTGGGAACACAGTACAGATCTGGAATATACTTTTACACTCCTGAACAAGAGAAAAAGCTAAGAGTC     |      |      |      |      |      |      |      |      |      |
| A41L_Mtr37742 | ATCCTACTACGCCAAATCGACAGGGGAATGATGTGGGAACACAGTACAGATCTGGAATATACTTTTACACTCCTGAACAAGAGAAAAAGCTAAGAGTC     |      |      |      |      |      |      |      |      |      |
|               | 810                                                                                                    | 820  | 830  | 840  | 850  | 860  | 870  | 880  | 890  | 900  |
| A41S_mRNA     | TTTGGAAACAACAAGAGAAGCAATTGGGCAGGAAGATTGCTACTGAGATTCTTCTCTG-----                                        |      |      |      |      |      |      |      |      |      |
| A41L_mRNA     | TTTGGAAACAACAAGAGAAGCAATTGGGCAGGAAGATTGCTACTGAGATTCTTCTCTGCCAAGAAGTTCTACAGGGCTGAGGAGTACCATCAACAGTACCTT |      |      |      |      |      |      |      |      |      |
| A41S_Mtr37743 | TTTGGAAACAACAAGAGAAGCAATTGGGCAGGAAGATTGCTACTGAGATTCTTCTCTGCCAAGAAGTTCTACAGGGCTGAGGAGTACCATCAACAGTACCTT |      |      |      |      |      |      |      |      |      |
| A41L_Mtr37742 | TTTGGAAACAACAAGAGAAGCAATTGGGCAGGAAGATTGCTACTGAGATTCTTCTCTGCCAAGAAGTTCTACAGGGCTGAGGAGTACCATCAACAGTACCTT |      |      |      |      |      |      |      |      |      |
|               | 910                                                                                                    | 920  | 930  | 940  | 950  | 960  | 970  | 980  | 990  | 1000 |
| A41S_mRNA     | -----                                                                                                  |      |      |      |      |      |      |      |      |      |
| A41L_mRNA     | GAGAAAGGGGGTCGATTTCGGTTTCAAGCAATCTGCTGCTAAAGGATGCAATGACCCAATTCGGTGCATGGTTAATTTGTTGATAAAACAAAGTGAATTTA  |      |      |      |      |      |      |      |      |      |
| A41S_Mtr37743 | GAGAAAGGGGGTCGATTTCGGTTTCAAGCAATCTGCTGCTAAAGGATGCAATGACCCAATTCGGTGCATGGTTAATTTGTTGATAAAACAAAGTGAATTTA  |      |      |      |      |      |      |      |      |      |
| A41L_Mtr37742 | -----                                                                                                  |      |      |      |      |      |      |      |      |      |
|               | 1010                                                                                                   | 1020 | 1030 | 1040 | 1050 | 1060 | 1070 | 1080 | 1090 | 1100 |
| A41S_mRNA     | -----                                                                                                  |      |      |      |      |      |      |      |      |      |
| A41L_mRNA     | TCCTCAAGGATCAATACGACACTGTATTTGAGCTTGAAAAATGGGCATAGCCATGAATTAGAGTTGTATACTGTCATCTATTATGTGTAATTTTGTGTAA   |      |      |      |      |      |      |      |      |      |
| A41S_Mtr37743 | TCCTCAAGGATCAATACGACACTGTATTTGAGCTTGAAAAATGGGCATAGCCATGAATTAGAGTTGTATACTGTCATCTATTATGTGTAATTTTGTGTAA   |      |      |      |      |      |      |      |      |      |
| A41L_Mtr37742 | -----                                                                                                  |      |      |      |      |      |      |      |      |      |
|               | 1110                                                                                                   | 1120 | 1130 | 1140 | 1150 | 1160 | 1170 | 1180 | 1190 | 1200 |
| A41S_mRNA     | -----                                                                                                  |      |      |      |      |      |      |      |      |      |
| A41L_mRNA     | AGTATTGTCTTGGCTACTTACAAACCAAAAAATAAAGACAAAATGTCTTTTCAGAAATTAGCAGAAATTGTGAACATTAGTAATTTCTAAAAATTGTAT    |      |      |      |      |      |      |      |      |      |
| A41S_Mtr37743 | AGTATTGTCTTGGCTACTTACAAACCAAAAAATAAAGACAAAATGTCTTTTCAGAAATTAGCAGAAATTGTGAACATTAGTAATTTCTAAAAATTGTAT    |      |      |      |      |      |      |      |      |      |
| A41L_Mtr37742 | -----                                                                                                  |      |      |      |      |      |      |      |      |      |
|               | 1210                                                                                                   | 1220 | 1230 | 1240 | 1250 | 1260 | 1270 | 1280 | 1290 | 1300 |
| A41S_mRNA     | -----                                                                                                  |      |      |      |      |      |      |      |      |      |
| A41L_mRNA     | GAACCTTCTCAGAGATCACTCCTCTTGATGGGTCAATTTCTCAAAGGCTGTTATGAAATCATAATTGAAGATGTATATTGAATTTAAATTTGTGAATN     |      |      |      |      |      |      |      |      |      |
| A41S_Mtr37743 | GAACCTTCTCAGAGATCACTCCTCTTGATGGGTCAATTTCTCAAAGGCTGTTATGAAATCATAATTGAAGATGTATATTGAATTTAAATTTGTGAATN     |      |      |      |      |      |      |      |      |      |
| A41L_Mtr37742 | -----                                                                                                  |      |      |      |      |      |      |      |      |      |

Fig. S4. Overlap of sequences of the probes and the TC corresponding to messengers *MSRA4.1S* and *MSRA4.1L*.

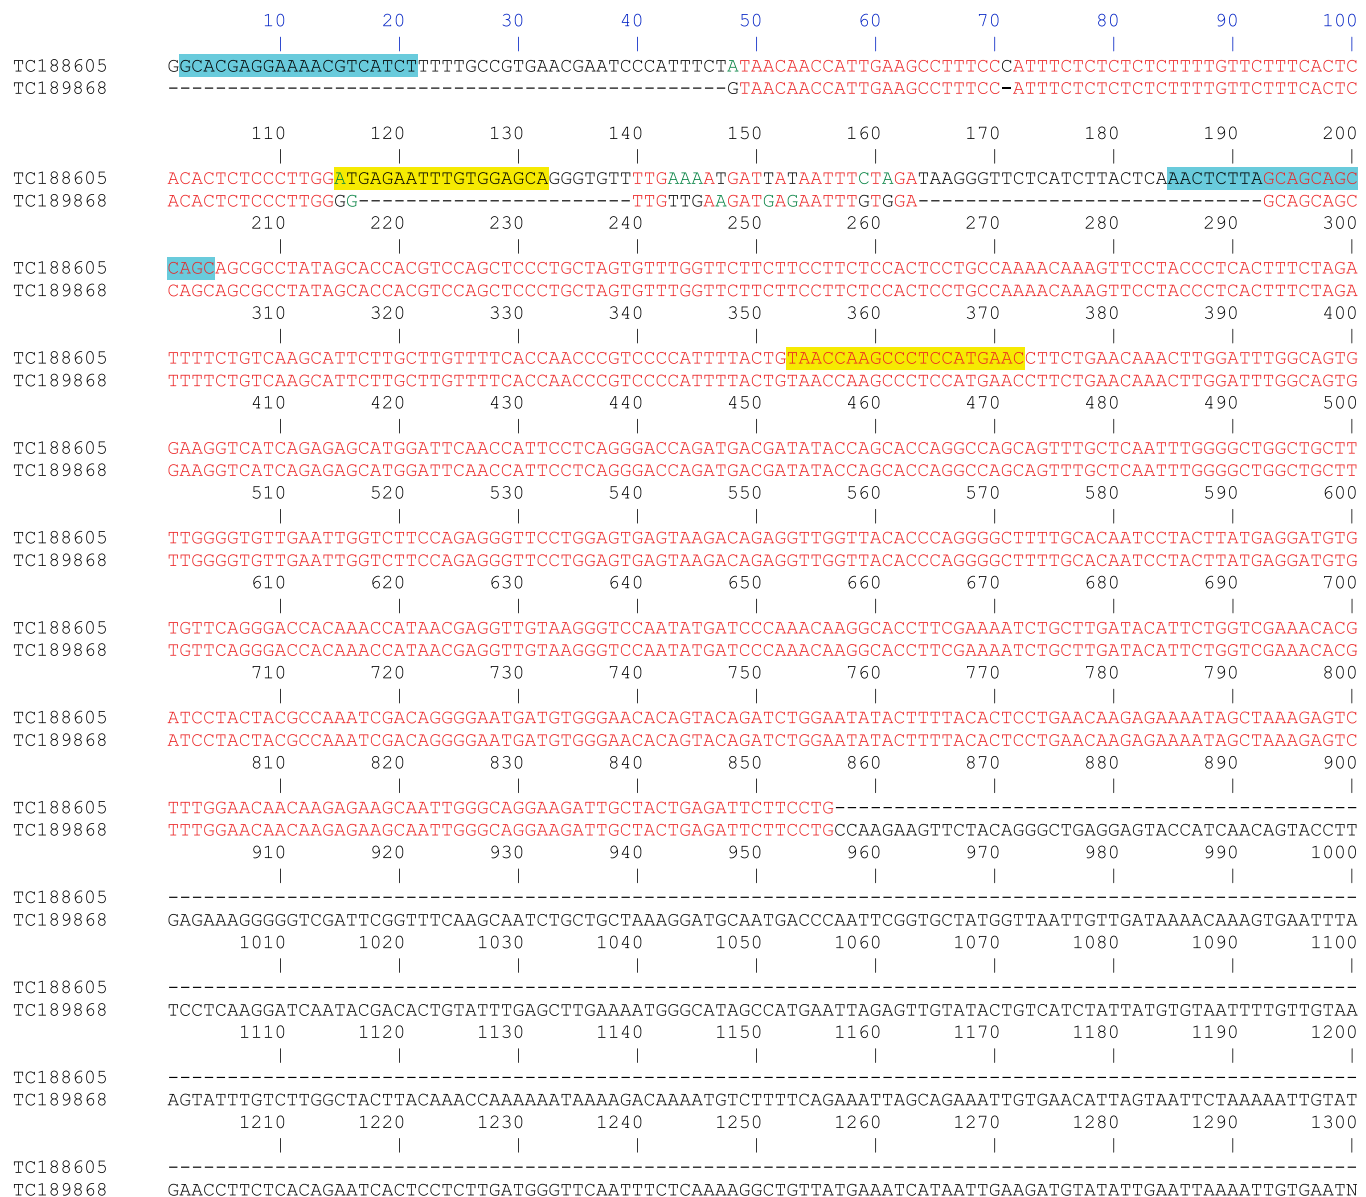

**Fig. S5.** Positions of the forward and reverse primers used to discriminate the messengers coding the short and long MSRA4.1 proteins. The positions of primers targeting the messenger coding for the protein either short (TC188605) or long (TC189868) are indicated in blue and yellow, respectively.

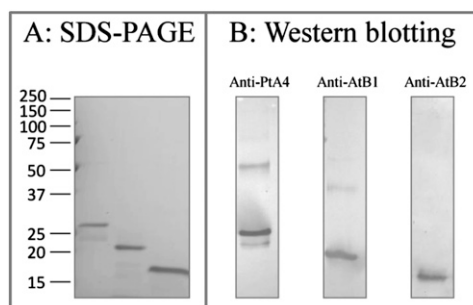

**Fig. S6.** Evaluation of recombinant MSRs from *M. truncatula* by SDS/PAGE and Western blot analysis. Proteins were overexpressed in *Escherichia coli*, purified, and resolved (1  $\mu$ g/lane for SDS/PAGE and 0.1  $\mu$ g/lane for Western blot) by 12% SDS/PAGE. Then proteins were either stained in the gel with Coomassie blue (A) or transferred onto a nitrocellulose membrane for immunodetection using anti-PtMSRA4, anti-AtMSRB1, or anti-AtMSRB2 antibodies (B). Molecular weight of standard proteins is indicated at the left of the gel obtained after SDS/PAGE. For the production of recombinant MSRs, the part of the coding regions corresponding to mature MSRs (without transit peptide) was amplified by PCR using 1  $\mu$ L of cDNAs (prepared as in Fig. S3), the proof reading KOD HiFi DNA polymerase (Novagen) and appropriate primers (Table S3) allowing the cloning of PCR products into the pRSF2 vector of the ligation-independent Ek/LIC cloning kit (Novagen). Amplicons of expected size were resolved, excised from agarose gels, and inserted into the pRSF2 plasmid as described by Alkhalfioui et al. (1). The pRSF2 vector is engineered to express target proteins fused to an N-terminal His tag. Recombinant pRSF2 plasmids were introduced in Rosetta blue *E. coli* for multiplication, sequencing, and production of recombinant MSRs. MSR purification on Ni<sup>2+</sup>-chelating Sepharose (Amersham) was carried out according to the manufacturer's instructions after a previous purification step on Q-Sepharose.

1. Alkhalfioui F, Renard M, Montrichard F (2007) Unique properties of NADP-thioredoxin reductase C in legumes. *J Exp Bot* 58:969–978.

Deterioration duration (d)    0    7    14    21

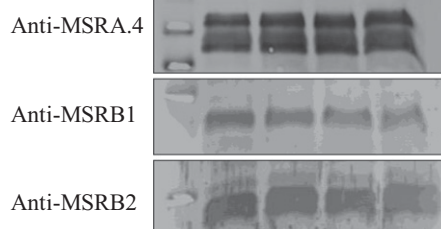

**Fig. S7.** Deterioration has no impact on MSR abundance in seeds. Abundance of MSR was measured by Western blot analysis in Jemalong seeds during deterioration. For that purpose, soluble proteins (15 or 25  $\mu$ g/lane), resolved by SDS/PAGE and transferred onto nitrocellulose membranes, were probed against anti-PtMSRA4, anti-AtMSRB1, or anti-AtMSRB2 sera (1/1,000).

**Table S1. Genes encoding the 10 MSR isoforms in *M. truncatula* Jemalong databases**

| Name  | TC no.           | BAC no.   | Chromosome no. | Gene name    | EST no. | Protein mass, kDa | Putative protein localization |
|-------|------------------|-----------|----------------|--------------|---------|-------------------|-------------------------------|
| A2    | 176241<br>201665 | AC235753  | —              | MTR_135s0002 | 9       | 22                | Cytosol                       |
| A4.1S | 188605           | CU179894  | 5              | MTR_5g092680 | 5       | 22.7              | Cytosol                       |
| A4.1L | 189868           | CU1798946 | 5              | MTR_5g092680 | 18      | 29.4              | Plastids                      |
| A4.2  | 181227           | CU861889  | 3              | MTR_3g051460 | 5       | 23.1              | Cytosol                       |
| A5    | 175213           | AC138453  | 8              | MTR_8g076060 | 7       | 28.7              | Endoplasmic reticulum         |
| B1    | 143308           | —         | —              | —            | 13      | 24.0              | Plastids                      |
| B2    | 143367           | AC202375  | 4              | MTR_4g092800 | 24      | 20.5              | Plastids                      |
| B5.1  | —                | AC169126  | 2              | MTR_2g020950 | —       | 15.1              | Cytosol                       |
| B5.2  | 145387           | AC169126  | 2              | MTR_2g020930 | 12      | 15.2              | Cytosol                       |
| B5.3  | —                | AC146553  | 2              | MTR_2g020900 | —       | 16.8              | Cytosol                       |

Presented are the names of MSR isoforms used in this work, according to the classification in poplar (1), and the corresponding numbers of TCs, BACs, and chromosomes. The number of ESTs found in databases and the putative localization are also given.

1. Rouhier N, Vieira Dos Santos C, Tarrago L, Rey P (2006) Plant methionine sulfoxide reductase A and B multigenic families. *Photosynth Res* 89(2-3):247–262.

**Table S2. Percentage of identity among the different MSR isoforms found in *M. truncatula*, using long protein A4.1L for calculations**

| MSRA2 | MSRA4.1L | MSRA4.2 | MSRA5 | MSRB1 | MSRB2 | MSRB5.1 | MSRB5.2 | MSRB5.3 |
|-------|----------|---------|-------|-------|-------|---------|---------|---------|
| MSRA2 | 61       | 59      | 31    | 11    | 10    | 12      | 12      | 11      |
|       | MSRA4.1L | 80      | 24    | 11    | 10    | 14      | 12      | 10      |
|       |          | MSRA4.2 | 29    | 10    | 10    | 12      | 11      | 11      |
|       |          |         | MSRA5 | 11    | 13    | 13      | 16      | 13      |
|       |          |         |       | MSRB1 | 31    | 33      | 36      | 23      |
|       |          |         |       |       | MSRB2 | 70      | 75      | 51      |
|       |          |         |       |       |       | MSRB5.1 | 91.3    | 71      |
|       |          |         |       |       |       |         | MSRB5.2 | 71      |
|       |          |         |       |       |       |         |         | MSRB5.3 |

The color code corresponds to the scale of values indicated at the bottom left of the table.

**Table S3. Primers used for RT-PCR and cloning experiments**

| Primer name                        | Primer sequence                     | Annealing temperature (°C) | Amplicon size (bp) |
|------------------------------------|-------------------------------------|----------------------------|--------------------|
| <b>For RT-PCR experiments</b>      |                                     |                            |                    |
| QMSRA4.1CSpe_F                     | GCACGAGGAAAACGTCATCT                | 60                         | 203                |
| QMSRA4.1CSpe_R                     | GCTGGCTGCTGCTAAGAGTT                |                            |                    |
| QMSRA4.1LSpe_F                     | TGAGAATTTGTGGAGCAGCA                | 60                         | 197                |
| QMSRA4.1LSpe_R                     | GTTTCATGGAGGGCTTGTTA                |                            |                    |
| QMSRA4.2bis_F                      | AGGTCAACAGTTTGCCAGT                 | 60                         | 221                |
| QMSRA4.2bis_R                      | ACGCATCAAGCAGAGTCTCA                |                            |                    |
| QMSRB1_F                           | GGGGAGAATGGCATCTCATA                | 60                         | 203                |
| QMSRB1_R                           | CTGTGGTGTTGGGTTGTTG                 |                            |                    |
| QMSRB2_F                           | ACCATTTCATTCTGCAACC                 | 60                         | 196                |
| QMSRB2_R                           | CCTCCCCAAGAAGTTGTCA                 |                            |                    |
| <b>For cloning in pRSF2 vector</b> |                                     |                            |                    |
| A 4.1cSens                         | gacgacgacaagatgAACCTTCTGAACAACT     | 54                         | 678                |
| A4.1cANTI                          | gaggagaagcccggtTCAACCATAGCACCGAATTG |                            |                    |
| B1matSens                          | gacgacgacaagatgGGCTCTTCAGCTTCT      | 54                         | 539                |
| B1matANTI                          | gaggagaagcccggtTCATCTTACTCCCTTGGT   |                            |                    |
| B2matSens                          | gacgacgacaagatgTCTGTGCACCTACT       | 54                         | 483                |
| B2matANTI                          | gaggagaagcccggtTCAGGAATTGGCTGGCGCAA |                            |                    |

For PCR experiments, PCR was performed after a preliminary denaturation step of 4 min at 94 °C, followed by a set of 35 cycles (94 °C × 1 min, 60 °C × 1 min, and 72 °C × 1 min) then a final elongation step of 10 min at 72 °C. In the case of cloning experiments, the part of the sequence of the primers that appears in lower case was added to allow the cloning of the PCR products into the pRSF2 vector according to the instructions of the manufacturers. The annealing temperatures indicated in the table correspond to the specific part of the sequence (in upper case) used for the first five cycles of PCR (94 °C × 1 min, 54 °C × 1 min, and 72 °C × 1 min), the annealing temperature being raised to 72 °C for further 30 cycles (94 °C × 1 min, 72 °C × 2 min).

**Table S4. MSR capacity of leaves, and MSR capacity and longevity of seeds of *A. thaliana* WT and of lines modified for the expression of genes encoding plastidial MSRB1 and MSRB2**

| <i>A. thaliana</i> lines         | MSR capacity, pmol·mg <sup>-1</sup> ·min <sup>-1</sup> |            | Seed longevity, P50, d |
|----------------------------------|--------------------------------------------------------|------------|------------------------|
|                                  | Leaf                                                   | Seed       |                        |
| WT                               | 48.6 ± 6.9                                             | 74 ± 7.0   | 36                     |
| B1 <sup>-</sup>                  | 38.4 ± 6.9                                             | 77 ± 1.8   | 38                     |
| B2 <sup>-</sup>                  | 21.9 ± 1.9                                             | 45 ± 2.6   | 33                     |
| B1 <sup>-</sup> /B2 <sup>-</sup> | 11.6 ± 4.4                                             | 65 ± 1.5   | 33                     |
| B1 <sup>+</sup> -8               | 183 ± 29                                               | 100 ± 9.4  | 44                     |
| B1 <sup>+</sup> -10              | 182 ± 28                                               | 81 ± 7.1   | 40                     |
| B2 <sup>+</sup> -3               | 383 ± 12                                               | 75 ± 9.3   | 40                     |
| B2 <sup>+</sup> -5               | 3,200 ± 84                                             | 1,700 ± 32 | 30                     |

Leaf MSR capacity was determined previously in the same lines (1, 2). B1<sup>-</sup> and B2<sup>-</sup>, mutant lines knocked out for MSRB1 and MSRB2, respectively; B1<sup>+</sup> and B2<sup>+</sup>, lines overexpressing MSRB1 and MSRB2, respectively.

- Laugier E, et al. (2010) *Arabidopsis thaliana* plastidial methionine sulfoxide reductases B, MSRBs, account for most leaf peptide MSR activity and are essential for growth under environmental constraints through a role in the preservation of photosystem antennae. *Plant J* 61(2):271–282.
- Laugier E, et al. (2012) Involvement of thioredoxin y2 in the preservation of leaf methionine sulfoxide reductase capacity and growth under high light. *Plant Cell Environ*, 10.1111/pce.12005.
